# Supplementary material for: The crystal structure and electrical properties of the oxide ion conductor Ba3WNbO8.5
Source: Royal Society of Chemistry journal article supplement (doi:10.1039/c7ta08989a), 2017-12-01
Supplement: c7ta08989a1.pdf [file c7ta08989a1.pdf]

## Supplementary Information

The Crystal Structure and Electrical Properties of the Oxide Ion

Conductor  $\text{Ba}_3\text{WNbO}_{8.5}$

K. S. McCombie<sup>a</sup>, E. J. Wildman<sup>a</sup>, S. Fop<sup>a</sup>, R. I. Smith<sup>b</sup>, J. M. S. Skakle<sup>a</sup> and A. C. Mclaughlin<sup>a</sup>

<sup>a</sup> Department of Chemistry, University of Aberdeen, Meston Walk, Aberdeen AB24 3UE,  
United Kingdom

<sup>b</sup> ISIS Facility, STFC Rutherford Appleton Laboratory, Harwell Campus, Didcot, OX11 0QX, UK

**a**

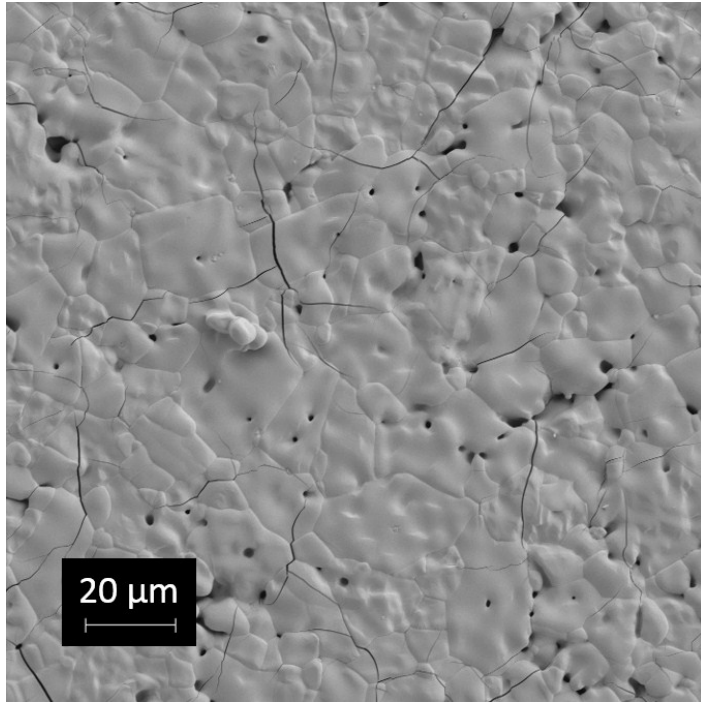

**b**

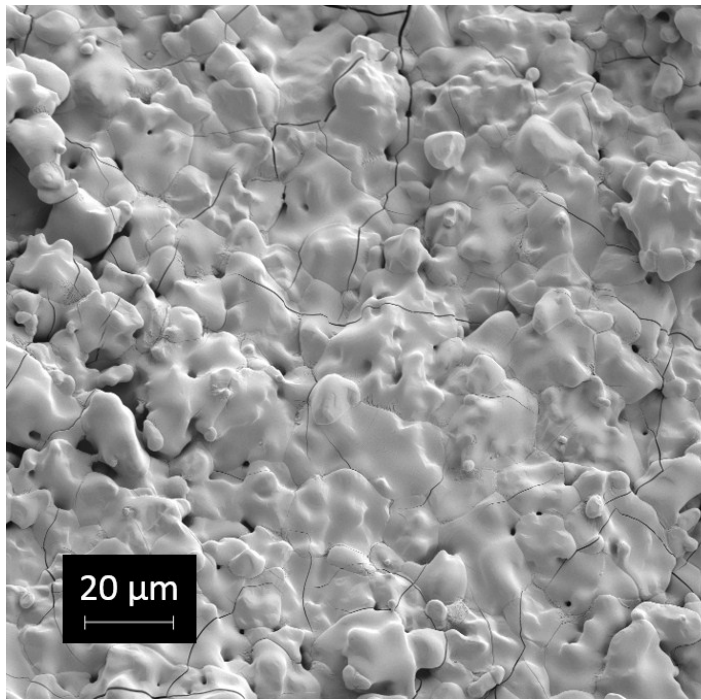

**Figure S1** SEM micrographs of the surface (a) and section (b) of a pellet of  $\text{Ba}_3\text{WNbO}_{8.5}$

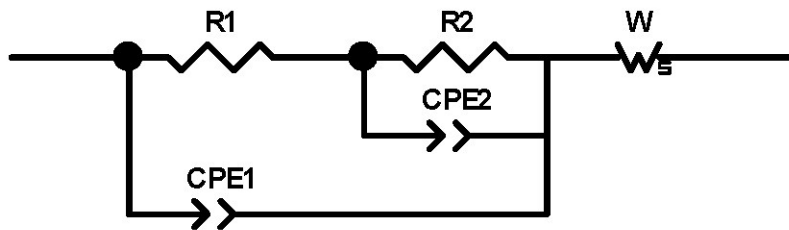

**Figure S2** Equivalent circuit used to model the impedance data. The same equivalent circuit is reported in reference 1. R indicates a resistor and CPE a constant phase element. R1 and R2 represent the bulk and grain boundary respectively.

### Reference

1. H. Zhang, A.Suresh, C. B. Carter and B. A. Wilhite, *Solid State Ionics*, 2014, **266**, 58-67.

**Table S1.** Refined atomic parameters for Ba<sub>3</sub>WNbO<sub>8.5</sub> from the Rietveld fit of the neutron powder diffraction data recorded on the Polaris diffractometer.

| Atom  | Site | x          | y          | z           | Occupancy | U <sub>11</sub> (Å <sup>2</sup> ) | U <sub>22</sub> (Å <sup>2</sup> ) | U <sub>33</sub> (Å <sup>2</sup> ) | U <sub>12</sub> (Å <sup>2</sup> ) | U <sub>13</sub> (Å <sup>2</sup> ) | U <sub>23</sub> (Å <sup>2</sup> ) |
|-------|------|------------|------------|-------------|-----------|-----------------------------------|-----------------------------------|-----------------------------------|-----------------------------------|-----------------------------------|-----------------------------------|
| Ba(1) | 3a   | 0          | 0          | 0           | 1         | 0.0005(5)                         | 0.0005(5)                         | 0.0053(9)                         | 0.0002(3)                         | 0                                 | 0                                 |
| Ba(2) | 6c   | 0          | 0          | 0.21005(9)  | 1         | 0.0143(4)                         | 0.0143(4)                         | 0.0168(10)                        | 0.0071(2)                         | 0                                 | 0                                 |
| W(1)  | 6c   | 0          | 0          | 0.39288(10) | 0.387(9)  | 0.0047(3)                         | 0.0047(3)                         | 0.0271(10)                        | 0.0024(2)                         | 0                                 | 0                                 |
| Nb(1) | 6c   | 0          | 0          | 0.39288(10) | 0.428(9)  | 0.0047(3)                         | 0.0047(3)                         | 0.0271(10)                        | 0.0024(2)                         | 0                                 | 0                                 |
| W(2)  | 3b   | 0          | 0          | 0.5         | 0.23(2)   | 0.022(3)                          | 0.022(3)                          | 0.40(2)                           | 0.0110(13)                        | 0                                 | 0                                 |
| Nb(2) | 3b   | 0          | 0          | 0.5         | 0.14(2)   | 0.022(3)                          | 0.022(3)                          | 0.40(2)                           | 0.0110(13)                        | 0                                 | 0                                 |
|       |      |            |            |             |           |                                   | 0.0167(3)                         |                                   |                                   |                                   | -                                 |
| O(1)  | 18h  | 0.17444(8) | 0.82556(8) | 0.10596(4)  | 1         | 0.0167(3)                         |                                   | 0.0240(5)                         | 0.0134(4)                         | 0.0030(2)                         | 0.0030(2)                         |
| O(2)  | 9e   | 0.5        | 0          | 0           | 0.758(3)  | 0.0175(6)                         | 0.0299(10)                        | 0.0207(10)                        | 0.0150(5)                         | 0.0113(5)                         | 0.0226(9)                         |
| O(3)  | 18h  | 0.050(2)   | 0.010(4)   | 0.3209(11)  | 0.038(2)  | 0.025(6) <sup>a</sup>             |                                   |                                   |                                   |                                   |                                   |

<sup>a</sup> U<sub>iso</sub> (Å<sup>2</sup>)

**Table S2.** Selected bond lengths calculated from the Rietveld refinement of powder neutron diffraction data of Ba<sub>3</sub>MoNbO<sub>8.5</sub> and Ba<sub>3</sub>WNbO<sub>8.5</sub>.

| Bond-length (Å) | Ba <sub>3</sub> MoNbO <sub>8.5</sub> | Ba <sub>3</sub> WNbO <sub>8.5</sub> |
|-----------------|--------------------------------------|-------------------------------------|
| Ba(1)-O(1)      | 2.8080(6)                            | 2.8427(8)                           |
| Ba(1)-O(2)      | 2.96372(2)                           | 2.92844(5)                          |
| Ba(1)-O(3)      | 3.015(5)                             | 3.170(7)                            |
| Ba(2)-O(1)      | 2.799(2)/2.997(2)                    | 2.812(2)/2.9520(3)                  |
| Ba(2)-O(2)      | 3.180(2)                             | 3.092(2)                            |
| Ba(2)-O(3)      | 2.447(3)                             | 2.38(2)                             |
| M(1)-O(1)       | 1.8337(8)                            | 1.884(1)                            |
| M(1)-O(2)       | 2.2065(8)                            | 2.103(1)                            |
| M(1)-O(3)       | 1.766(4)                             | 1.59(2)                             |
| M(2)-O(1)       | 2.1260(6)                            | 2.0550(9)                           |
| D*              | 0                                    | 0.32                                |

\*D is the displacement of the M(1) atom closer to the O(2)/O(3) sites, in respect to its equilibrium position in Ba<sub>3</sub>MoNbO<sub>8.5</sub>.

**Table S3.** Selected bond angles calculated from the Rietveld refinement of powder neutron diffraction data of Ba<sub>3</sub>MoNbO<sub>8.5</sub> and Ba<sub>3</sub>WNbO<sub>8.5</sub>.

| Angle (°)                   | Ba <sub>3</sub> MoNbO <sub>8.5</sub> | Ba <sub>3</sub> WNbO <sub>8.5</sub> |
|-----------------------------|--------------------------------------|-------------------------------------|
| O(1)-M(1)-O(1) ( $\alpha$ ) | 102.83(5)                            | 95.66(9)                            |
| O(1)-M(1)-O(3) ( $\beta$ )  | 114.8(2)                             | 125.2(4)                            |
| O(1)-M(1)-O(2) ( $\gamma$ ) | 85.51(2)                             | 87.91(2)                            |
| O(1)-M(1)-O(2) ( $\gamma$ ) | 166.34(7)                            | 174.67(11)                          |
| O(2)-M(1)-O(2) ( $\delta$ ) | 84.38(4)                             | 88.26(7)                            |
| O(1)-M(2)-O(1)              | 84.79(2)                             | 85.58(3)                            |
| O(1)-M(2)-O(1)              | 95.213(2)                            | 94.43(3)                            |

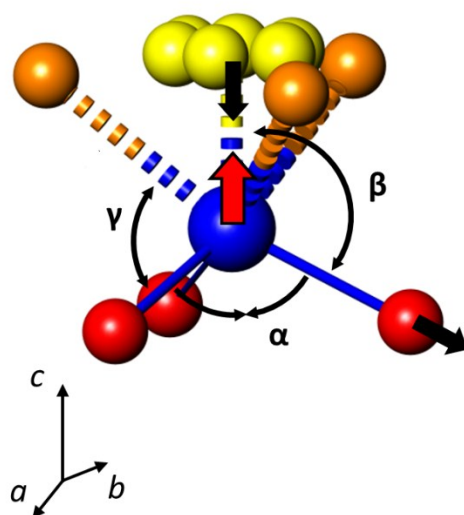

**Fig. S3** A superimposition of the coordination of the  $M(1)-O(1)_3O(3)$  tetrahedra and the  $M(1)-O(1)_3O(2)_3$  octahedra. The black arrows show the modifications of the bond lengths and angles for  $Ba_3WNbO_{8.5}$  from the values found for  $Ba_3MoNbO_{8.5}$ . The red arrow represents the average  $M(1)$  displacement.
